# Supplementary material for: Insights into the intrinsic capacity of interlayer-expanded MoS2 as a Li-ion intercalation host
Source: Royal Society of Chemistry journal article supplement (doi:10.1039/c8ta08120d), 2018-12-08
Supplement: c8ta08120d1.pdf [file c8ta08120d1.pdf]

## Supporting Information

# Insights into the exceeding capacity of interlayer-expanded MoS<sub>2</sub> as a Li-ion intercalation host

*Shan Gong,<sup>a</sup> Guangyu Zhao,<sup>b\*</sup> Pengbo Lyu,<sup>c</sup> Kening Sun<sup>b\*</sup>*

<sup>a</sup>School of Chemistry and Chemical Engineering, Harbin Institute of Technology, Harbin 150001, P. R. China

<sup>b</sup>Academy of Fundamental and Interdisciplinary Sciences, Harbin Institute of Technology, Harbin 150001, P. R. China

<sup>c</sup>Department of Physical and Macromolecular Chemistry, Charles University, Hlavova 2030, Prague 2, Prague 12843, Czech Republic

\*E-mail: [keningsunhit@126.com](mailto:keningsunhit@126.com); [zhaogy810525@gmail.com](mailto:zhaogy810525@gmail.com)

### Kinetics analysis (calculating the $b$ -value and capacitive-type charge storage)

The dependency of the current response on the sweep rate in a cyclic voltammetry experiment can be utilized to distinguish the charge storage process according to Equation (1):<sup>1,2</sup>

$$i = av^b \quad (1)$$

$i$  is fit to a power law with scan rate  $v$ , and the exponential term  $b$  can be determined from the slope of the  $\log(i)$  versus  $\log(v)$  plot. Values of  $b = 0.5$  indicate that the current is proportional to the square root of the scan rate, which is consistent with traditional diffusion dominated charge storage. On the other hand, when  $b = 1$  the current is linearly proportional to the scan rate, which is characteristic of a capacitor-like charge storage mechanism.

At a particular potential, the current is contributed from both capacitive and diffusion behaviours, thus, the capacitive contributions can be identified by the following Equation (2):<sup>3</sup>

$$i = k_1v + k_2v^{1/2} \quad (2)$$

$k_1v$  and  $k_2v^{0.5}$  correspond to capacitive and diffusion contributions to the measured current, respectively, where  $v$  is the scan rate in  $\text{mV s}^{-1}$ .

### Impedance Spectroscopy Analysis (calculating the Warburg coefficient ( $\sigma$ ))

The Li-ion diffusion coefficient ( $D_{\text{Li}}$ ) can be calculated based on the following Equation (3):<sup>4</sup>

$$D_{\text{Li}} = \frac{R^2T^2}{2A^2n^4F^4C^2\sigma^2} \quad (3)$$

Here,  $R$  is the gas constant,  $T$  is the absolute temperature,  $A$  is the surface area of the cathode,  $n$  is the number of electrons per molecule attending the electronic transfer reaction,  $F$  is Faraday constant,  $C$  is the concentration of lithium ion, and  $\sigma$  is the Warburg coefficient associated with the slope of the linear fittings in the low frequency region. The value of  $D_{\text{Li}}$  has the positive

relationship with  $1/\sigma^2$ , so the trend of  $1/\sigma^2$  reflects the changes of  $D_{Li}$ .

In addition,  $\sigma$  has the relationship with  $Z_{re}$  according to Equation (4):<sup>4</sup>

$$Z_{re} = R_s + R_f + \sigma \omega^{-0.5} \quad (4)$$

So the value of  $\sigma$  is the slope of the graph of  $Z_{re}$  against  $\omega^{-0.5}$  in the low frequency region.

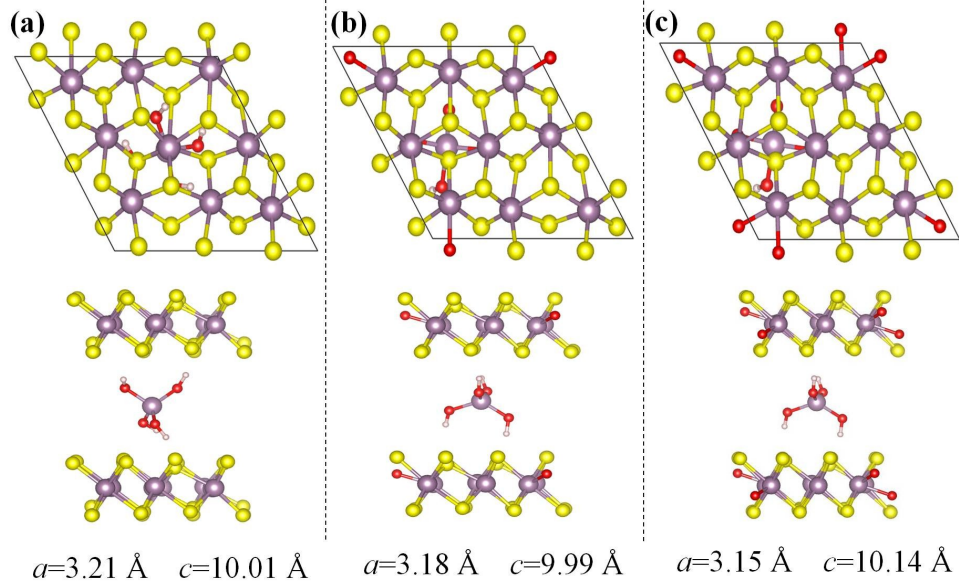

**Figure S1.** The atomic structures of molybdenum species ( $\text{Mo}(\text{OH})_4$ ) incorporated into  $\text{MoS}_2$  with corresponding lattice constants. Three situations are considered: (a) no sulfur atom is substituted by oxygen atom; (b) one sulfur atom is substituted by oxygen atom in one unit of  $\text{MoS}_2$ ; (c) two sulfur atoms are substituted by oxygen atom in one unit of  $\text{MoS}_2$ . The calculated interlayer spacing is around 10.0 Å, close to the interlayer distance of O- $\text{MoS}_2$  HNS in the experiment.

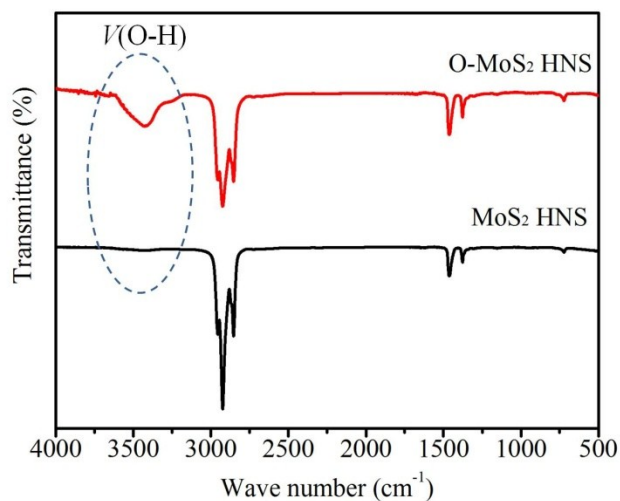

**Figure S2.** FT-IR spectra results of O-MoS<sub>2</sub> HNS and MoS<sub>2</sub> HNS in paraffin oil. The O–H stretch vibration of O-MoS<sub>2</sub> HNS is found at around 3400 cm<sup>-1</sup>, while no signal from hydroxyl groups is detected in MoS<sub>2</sub> HNS. The hydroxyl groups in O-MoS<sub>2</sub> HNS should come from the incorporated Mo(OH)<sub>4</sub> species. The signals between 3000 and 500 cm<sup>-1</sup> are attributed to the paraffin oil.

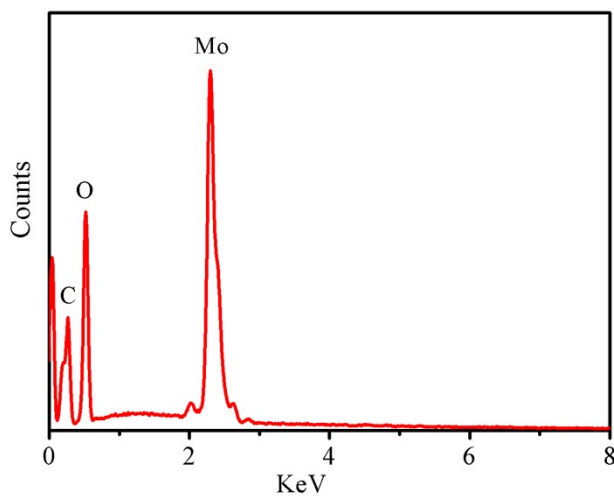

**Figure S3.** EDS spectrum of the MoG spheres.

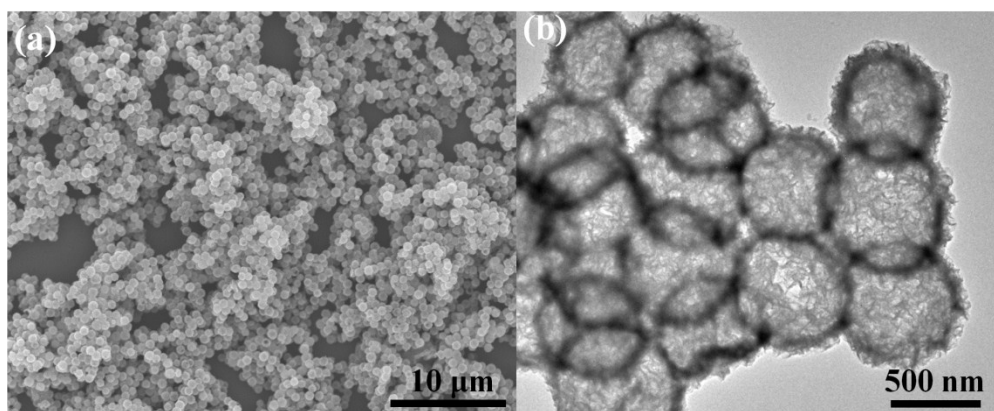

**Figure S4.** Low magnification (a) SEM and (b) TEM images of O-MoS<sub>2</sub> HNS.

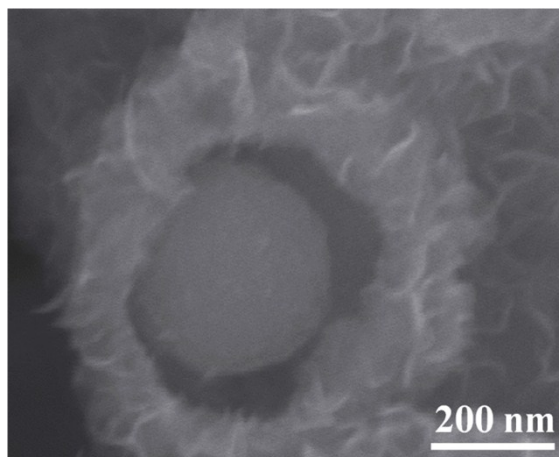

**Figure S5.** SEM image of the product after a shortened sulfidation process (3h).

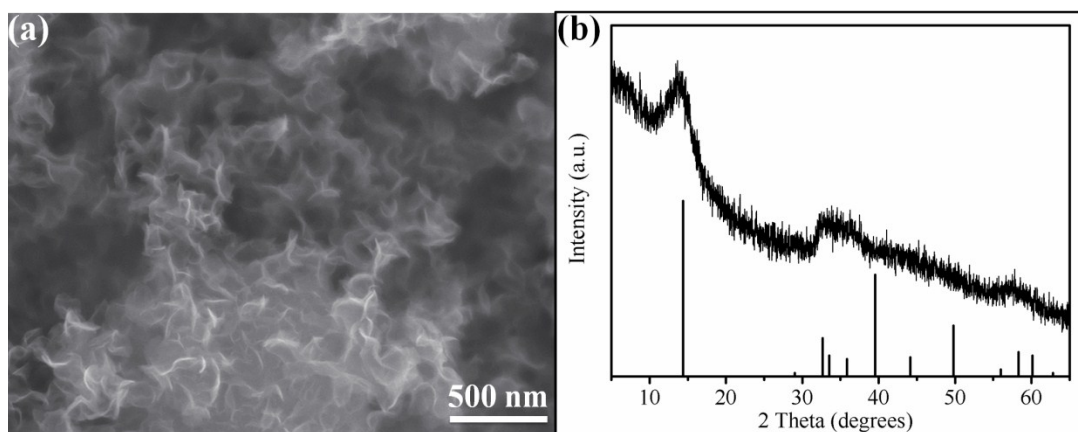

**Figure S6.** (a) SEM image of the MoS<sub>2</sub> nanosheets when the sulfidation temperature rising to 220 °C with the other conditions of the reaction are identical to that of O-MoS<sub>2</sub> HNS. (b) XRD pattern of as-obtained MoS<sub>2</sub> nanosheets. It is assigned to standard pattern of MoS<sub>2</sub> (JCPDS Card No. 37-1492).

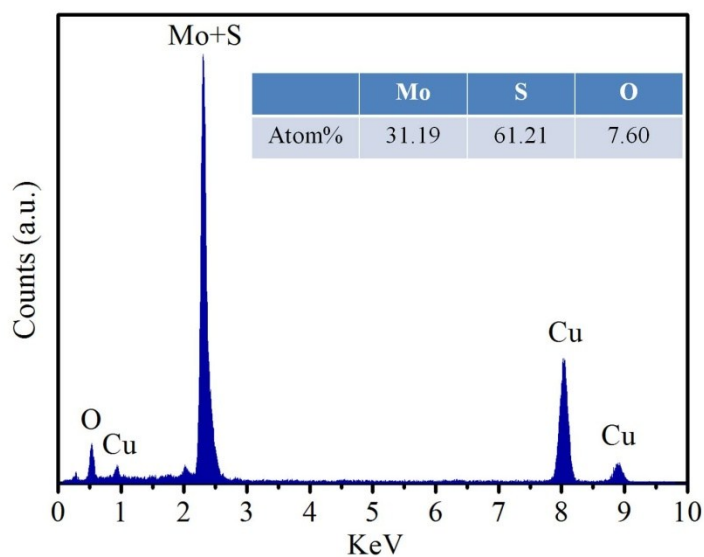

**Figure S7.** EDS spectrum of O-MoS<sub>2</sub> HNS. The inset table is the corresponding element contents.

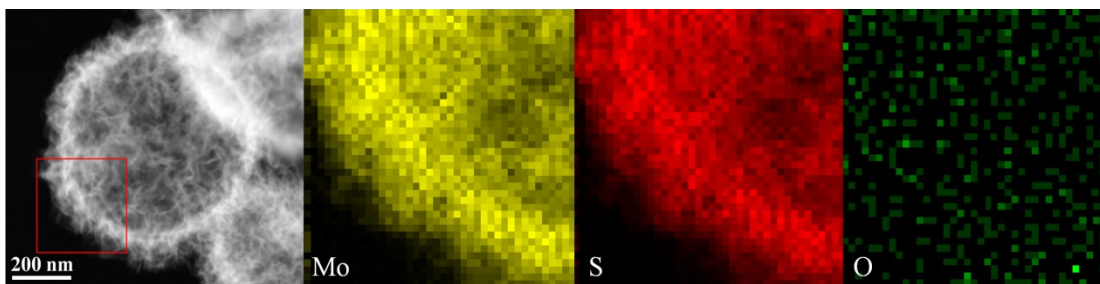

**Figure S8.** Element mapping images of MoS<sub>2</sub> HNS. Rare O element is found in MoS<sub>2</sub> HNS.

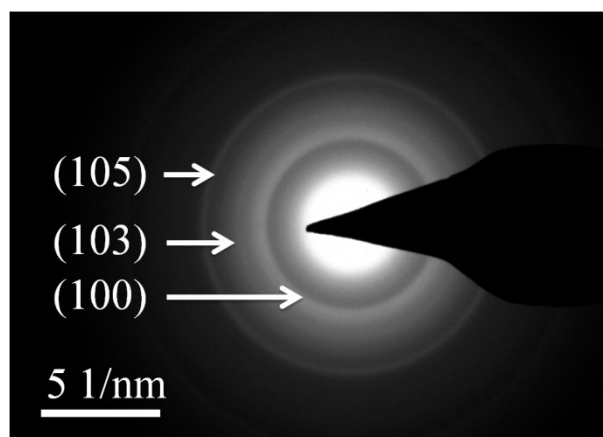

**Figure S9.** SAED pattern of O-MoS<sub>2</sub> HNS.

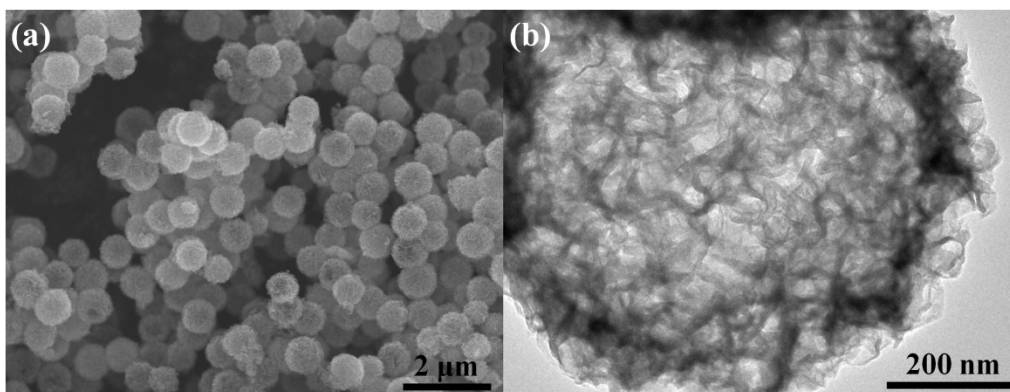

**Figure S10.** (a) Low magnification SEM image and (b) TEM image of MoS<sub>2</sub> HNS.

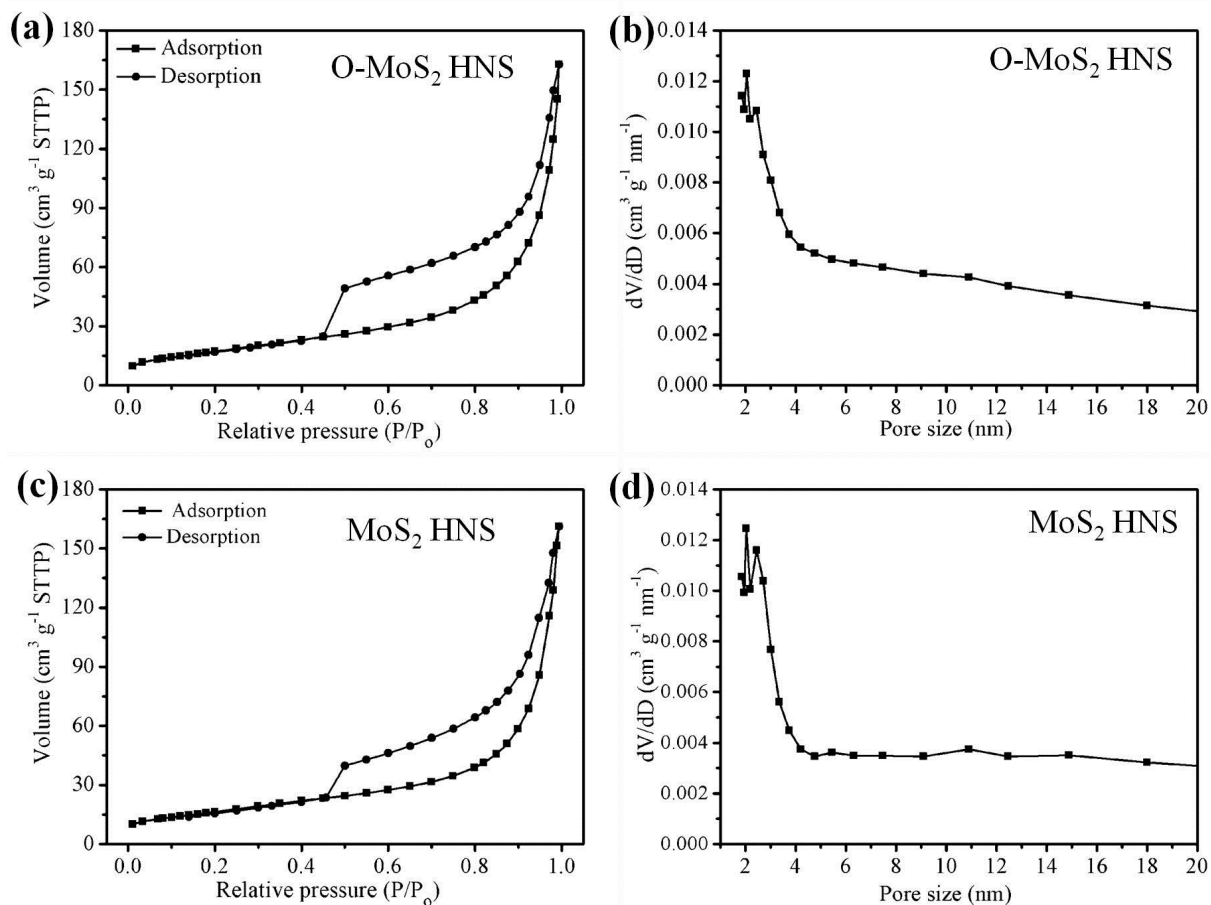

**Figure S11.** (a) N<sub>2</sub> adsorption-desorption isotherms of (a) O-MoS<sub>2</sub> HNS and (c) MoS<sub>2</sub> HNS. The BJH pore size distribution curves of (b) O-MoS<sub>2</sub> HNS and (d) MoS<sub>2</sub> HNS. The Brunauer-Emmett-Teller specific surface areas of O-MoS<sub>2</sub> HNS and MoS<sub>2</sub> HNS are 63.5 and 60.3 m<sup>2</sup> g<sup>-1</sup>, respectively.



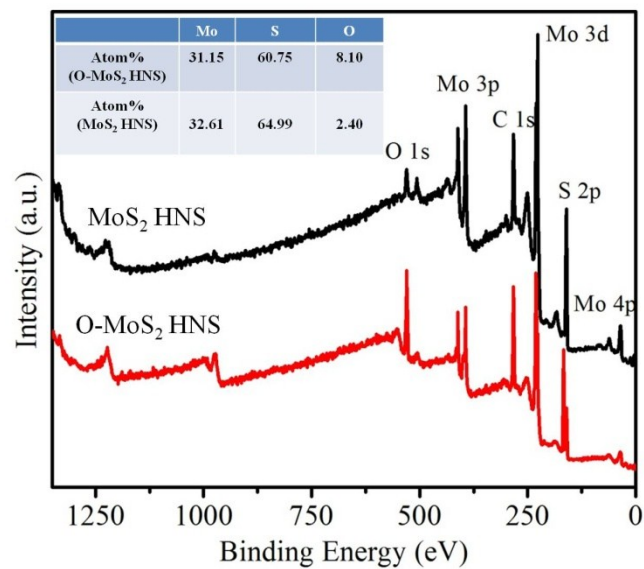

**Figure S12.** (a) XPS spectra of O-MoS<sub>2</sub> HNS and MoS<sub>2</sub> HNS. The inset table is the corresponding element contents.

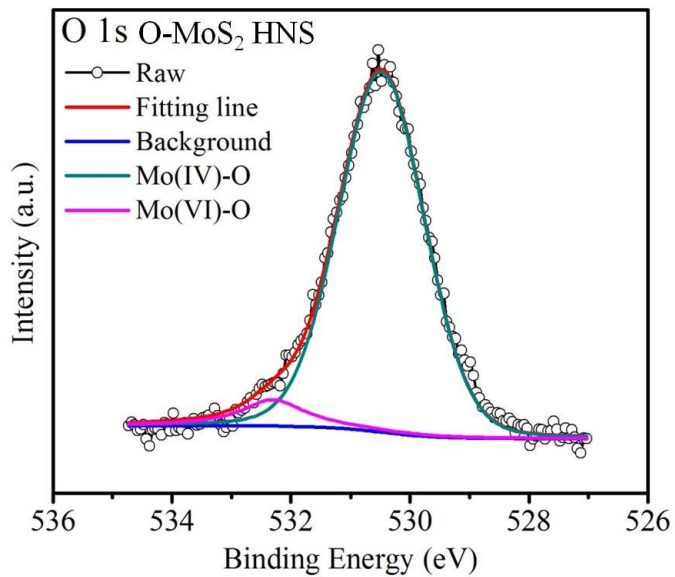

**Figure S13.** O 1s spectrum of O-MoS<sub>2</sub> HNS.

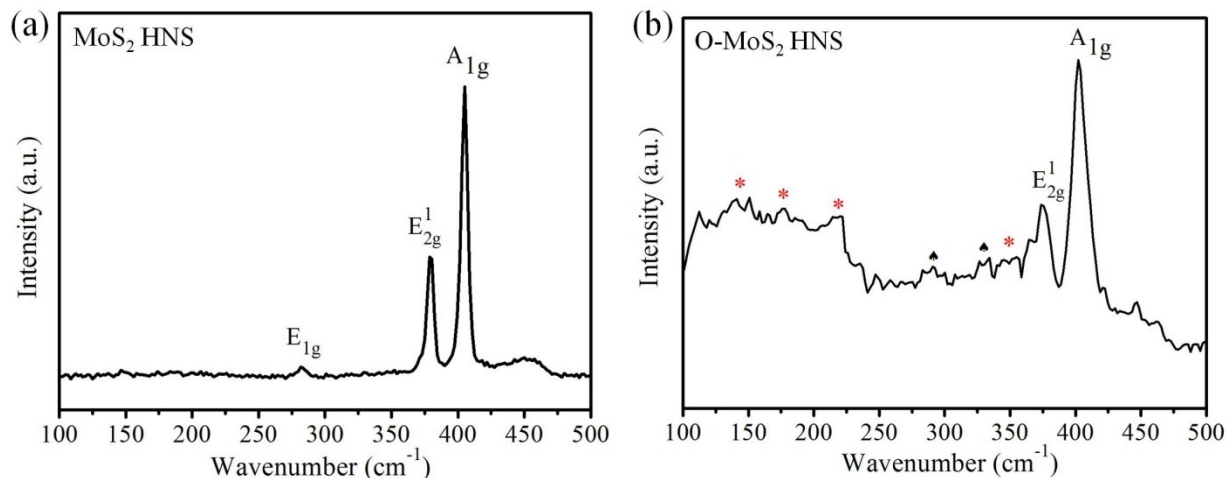

**Figure S14.** Raman spectra of (a) MoS<sub>2</sub> HNS and (b) O-MoS<sub>2</sub> HNS. MoS<sub>2</sub> HNS produces data characteristic of the 2H phase with peaks at 281, 377, and 403 cm<sup>-1</sup>, which corresponds to E<sub>1g</sub>, E<sub>2g</sub>, and A<sub>1g</sub> symmetries, respectively. The large peaks at 377 and 403 cm<sup>-1</sup> are also observed in O-MoS<sub>2</sub> HNS, in addition, four new peaks are observed in the O-MoS<sub>2</sub> HNS (labeled with \* at around 150, 178, 222, and 346 cm<sup>-1</sup>), confirming the existence of the 1T phase. The peaks at around 285 and 334 cm<sup>-1</sup> (labeled with ♠) can be identified as the B<sub>2g</sub> and B<sub>1g</sub> vibrational modes for Mo-O bonds, thus proving the successful oxygen incorporation in the product.

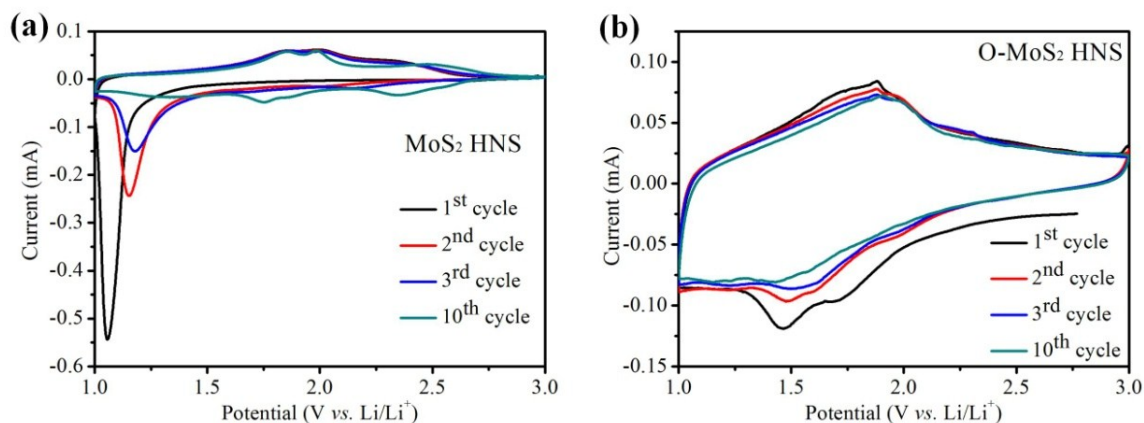

**Figure S15.** CV curves of (a) MoS<sub>2</sub> HNS and (b) O-MoS<sub>2</sub> HNS at 0.1 mV s<sup>-1</sup> between 1–3 V. In the H-MoS<sub>2</sub> system, its CVs display a prominent redox peak at 1.1 V vs Li/Li<sup>+</sup>, which is associated with the voltage plateau of 2H phase MoS<sub>2</sub>. As can be seen, the redox peaks at 1.1 V becomes weak following the cycles and nearly disappear at the 10<sup>th</sup> cycle. The large differential charge responses are caused by the 2H to 1T phase transition during the cycle process. As for HO-MoS<sub>2</sub>, its CV curves show unobvious changes in the subsequent cycles.

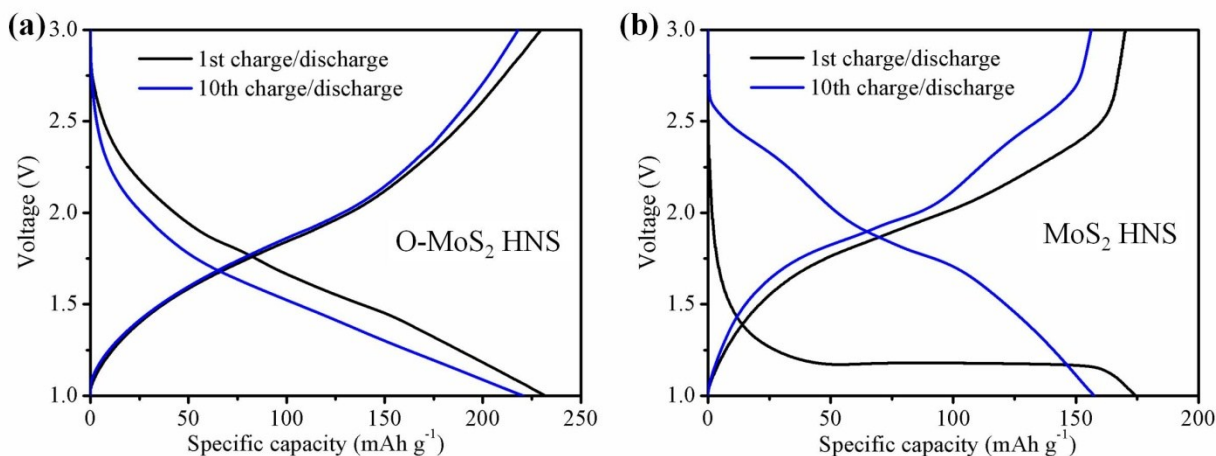

**Figure S16.** The 1<sup>st</sup> and 10<sup>th</sup> galvanostatic charge/discharge curve of (a) O-MoS<sub>2</sub> HNS and (b) MoS<sub>2</sub> HNS. The comparison of the charge/discharge curves at the first and 10<sup>th</sup> cycle for both samples reveals the two-phase behavior of MoS<sub>2</sub> HNS (obvious voltage plateau at around 1.2 V) during the first cycle. While O-MoS<sub>2</sub> HNS shows the single-phase behavior during Li-ion

intercalation/deintercalation (slope curve).

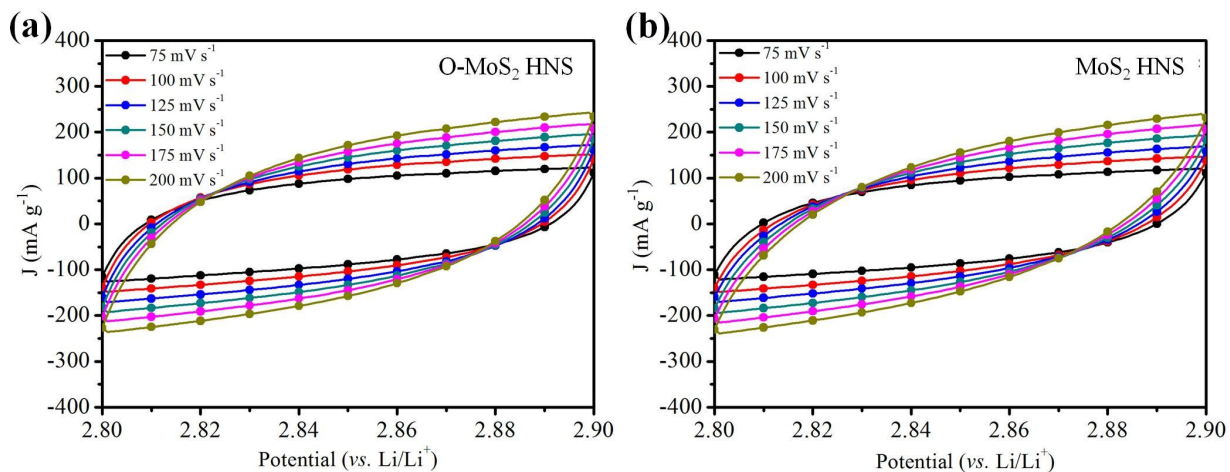

**Figure S17.** CV curves of (a) O-MoS<sub>2</sub> HNS and (b) MoS<sub>2</sub> HNS at various scan rates at a selected potential range of 2.80–2.90 V vs Li/Li<sup>+</sup>.

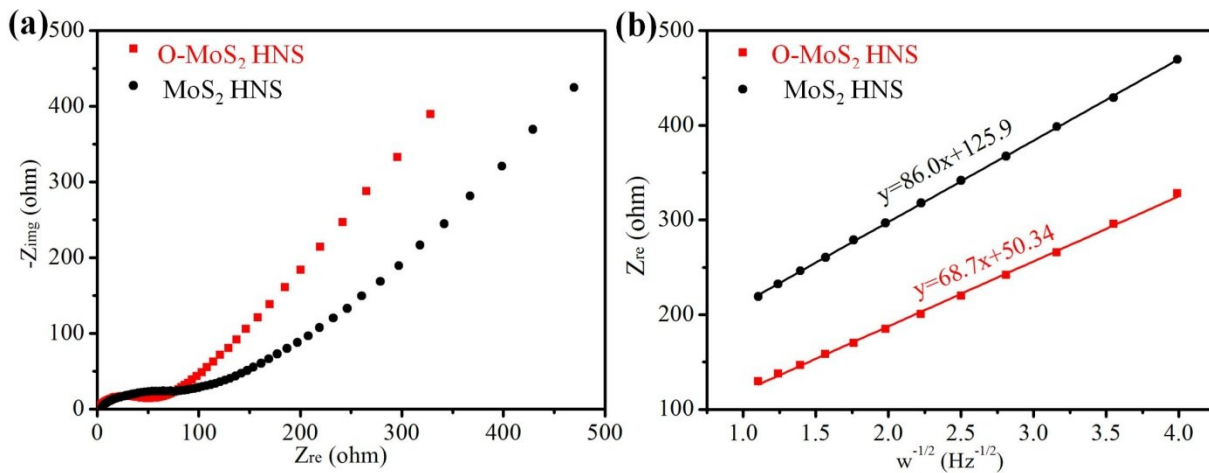

**Figure S18.** (a) Nyquist plots of O-MoS<sub>2</sub> HNS and MoS<sub>2</sub> HNS electrodes after the 10th cycles. (b) Linear fits of the relationship between  $Z_{\text{re}}$  and  $\omega^{-0.5}$  in the low-frequency region corresponding to (a).

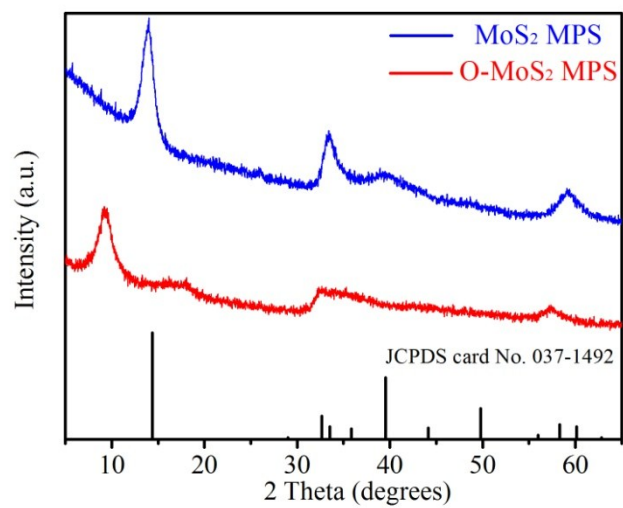

**Figure S19.** (a) XRD patterns of O-MoS<sub>2</sub> MPS and MoS<sub>2</sub> MPS.

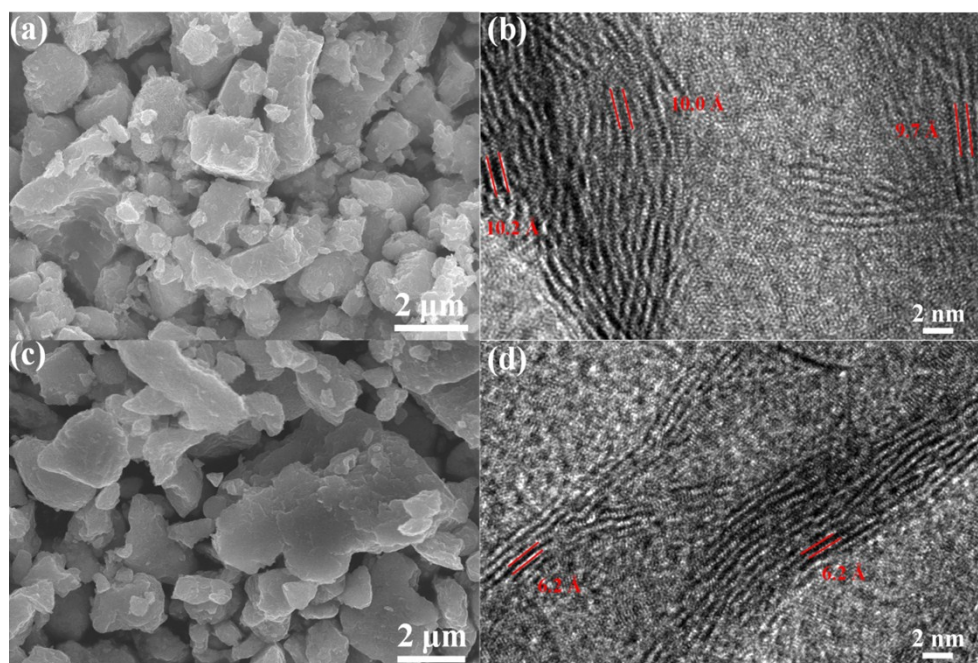

**Figure S20.** (a) SEM and (c) HRTEM images of O-MoS<sub>2</sub> MPS; (b) SEM and (d) HRTEM images of MoS<sub>2</sub> MPS.

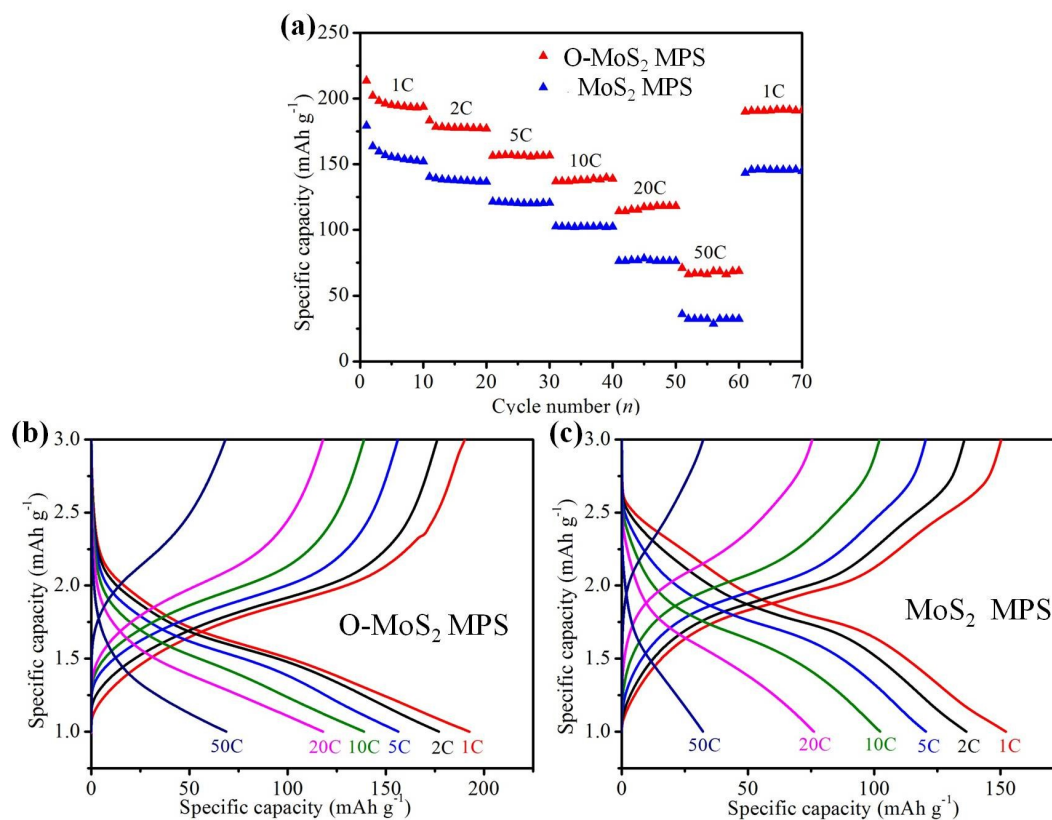

**Figure S21.** (a) Comparison of the rate performances of O-MoS<sub>2</sub> MPS and MoS<sub>2</sub> MPS at various rate currents. The galvanostatic charge/discharge curves of (b) O-MoS<sub>2</sub> MPS and (c) MoS<sub>2</sub> MPS the curves are based on the 10th cycles of various rate currents in (a).

## References:

- 1 J. Wang, J. Polleux, J. Lim and B. Dunn, *J. Phys. Chem. C*, 2007, **111**, 14925-14931.
- 2 H. Lindstrom, S. Sodergren, A. Solbrand, H. Rensmo, J. Hjelm, A. Hagfeldt and S. E. Lindquist, *J. Phys. Chem. B*, 1997, **101**, 7717-7722.
- 3 T. C. Liu, W. G. Pell, B. E. Conway and S. L. Roberson, *J. Electrochem. Soc.*, 1998, **145**, 1882-1888.
- 4 B. Chen, E. Liu, T. Cao, F. He, C. Shi, C. He, L. Ma, Q. Li, J. Li and N. Zhao, *Nano Energy*, 2017, **33**, 247-256.
